# Supplementary material for: ER exit sites are physical and functional core autophagosome biogenesis components
Source: PubMed Central journal article supplement — Mol Biol Cell. 2013 Sep 15;24(18):2918–31. doi: 10.1091/mbc.E13-07-0381 (PMC3771953; doi:10.1091/mbc.e13-07-0381), 2013-09-15
Supplement: supp_E13-07-0381_CombinedSupMats.pdf [file supp_E13-07-0381_CombinedSupMats.pdf]

# Supplemental Materials

*Molecular Biology of the Cell*

Graef et al.

**Figure S1: Autophagosome biogenesis occurs at ER exit sites.** (A-C) Wild type cells co-expressing *Cherry-ATG8* and *SEC23-GFP* (A), *SEC24-GFP* (B), or *SEC31-GFP* (C), respectively, were grown to log-phase and treated with rapamycin (400 ng/ml) for one hour. Cells were analyzed by fluorescence microscopy. Single focal planes of representative cells are shown. Scale bars, 1  $\mu\text{m}$ .

**Figure S2: Atg2 quantitatively associates with ERES.** Wild type cells expressing *ATG2-3xGFP* and *SEC13-Cherry* were grown to log-phase and treated with rapamycin (400 ng/ml) for one hour. Cells were analyzed by fluorescence microscopy. A single focal plane of a representative cell is shown. Bar graph depicts the number of Atg2-3-GFP-marked foci co-localizing with Sec13-Cherry (n = 143). Scale bars, 1  $\mu\text{m}$ .

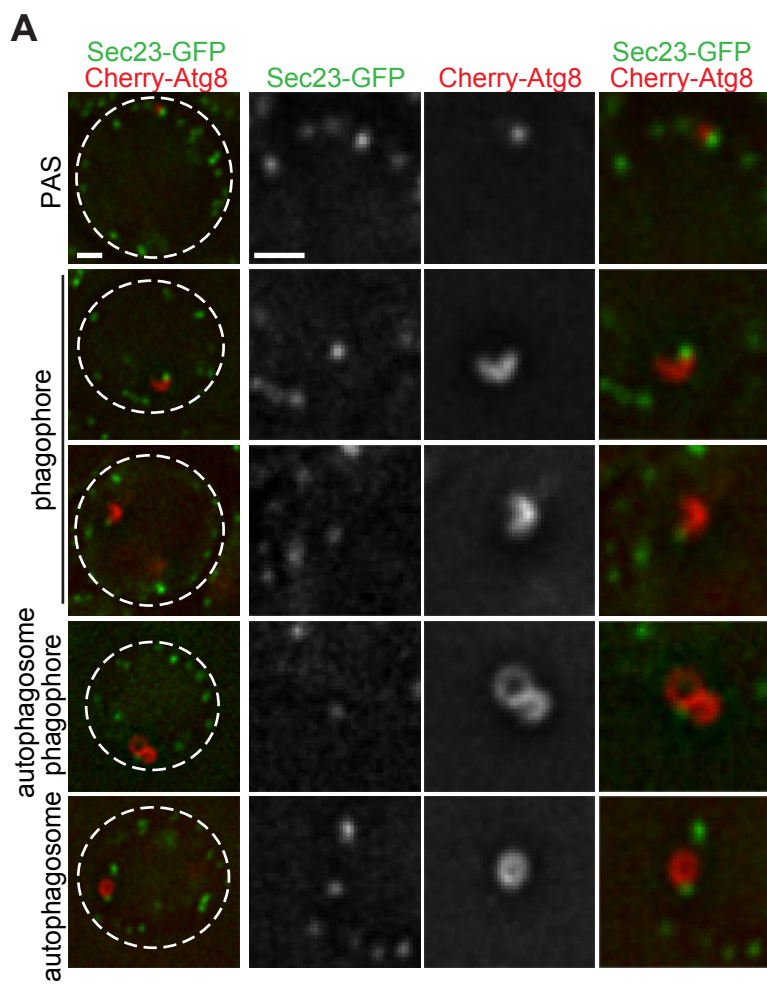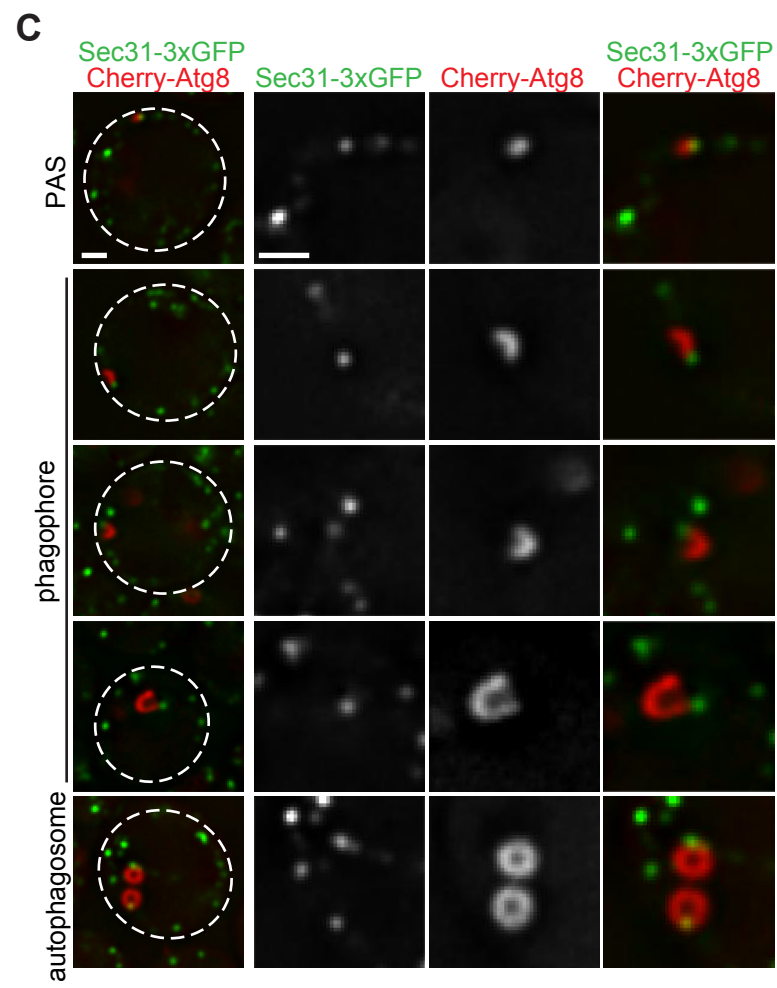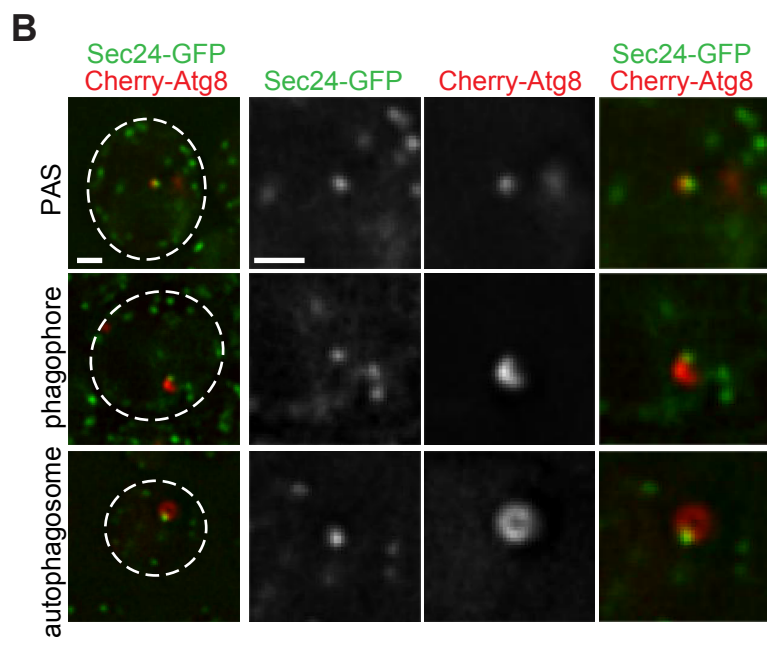

Figure S1

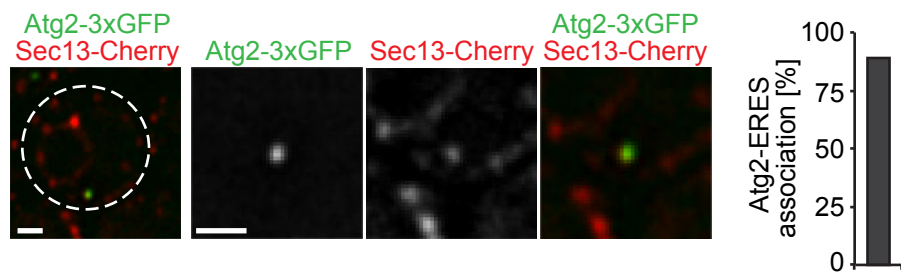

Figure S2
